1 **A dual-reporter system for investigating and optimizing protein translation**  
2 **and folding in *E. coli***

3

4 Ariane Zutz<sup>1,3</sup>, Louise Hamborg Nielsen<sup>1,2</sup>, Lasse Ebdrup Pedersen<sup>1</sup>, Maher M. Kassem<sup>2</sup>, Elena  
5 Papaleo<sup>2</sup>, Anna Koza<sup>1</sup>, Markus J. Herrgård<sup>1</sup>, Kaare Teilum<sup>2</sup>, Kresten Lindorff-Larsen<sup>2</sup>, Alex Toftgaard  
6 Nielsen<sup>1#</sup>

7

8

9 <sup>1</sup>The Novo Nordisk Foundation Center for Biosustainability, Technical University of Denmark,  
10 Kemitorvet, 2800 Kgs. Lyngby, Denmark

11

12 <sup>2</sup>Structural Biology and NMR Laboratory, Department of Biology, University of Copenhagen, Ole  
13 Maaloes Vej 5, 2200 Copenhagen N, Denmark

14

15 <sup>3</sup>Department of Virology, Max-von-Pettenkofer-Institute, LMU, Pettenkofer-Straße 9A, 80336 Munich,  
16 Germany

17

18 #Corresponding author

19 Phone: +45 45258010

20 Postal address: Building 220, Kemitorvet, 2800 Kgs. Lyngby, Denmark

21 Email: [atn@biosustain.dtu.dk](mailto:atn@biosustain.dtu.dk)

## 22 **Abstract**

23 Strategies for investigating and optimising the expression and folding of proteins for  
24 biotechnological and pharmaceutical purposes are in high demand. Here, we describe a dual-reporter  
25 biosensor system that simultaneously assesses *in vivo* protein translation and protein folding, thereby  
26 enabling rapid screening of mutant libraries. We have validated the dual-reporter system on five  
27 different proteins and find an excellent correlation between reporter intensity signals and the levels  
28 of protein expression and solubility of the proteins. We further demonstrate the applicability of the  
29 dual-reporter system as a screening assay for deep mutational scanning experiments. The system  
30 enables high throughput selection of protein variants with high expression levels and altered protein  
31 stability. Next generation sequencing analysis of the resulting libraries of protein variants show a good  
32 correlation between computationally predicted and experimentally determined protein stabilities. We  
33 furthermore show that the mutational experimental data obtained using this system may be useful  
34 for protein structure calculations.

35

## 36 **Introduction**

37 Expression of heterologous proteins is essential for a number of purposes including functional  
38 and structural characterization, as well as for industrial production of enzymes and biochemicals  
39 through metabolic pathway engineering. However, heterologous expression of recombinant proteins  
40 in bacteria such as *E. coli* often results in misfolding, aggregation and degradation of the proteins.  
41 Therefore, it is of significant importance to improve proteins for efficient expression.

42           Several strategies for improving expression and folding of heterologous proteins are known,  
43 including for example screening and optimisation of environmental factors such as host strain, growth  
44 medium and temperature, induction parameters and co-expression of folding chaperones<sup>1</sup>. Other  
45 strategies involve the use of protein affinity and solubility tags, which are short peptide or protein  
46 tags fused to the N- or C-terminus of a protein. Solubility tags function as folding scaffolds thereby  
47 helping to improve translation and folding of proteins with poor folding properties<sup>2</sup>. A small affinity  
48 tag is less likely to interfere with the three-dimensional structure of the protein<sup>3</sup>, and it has the  
49 advantage that it can be used for affinity purification and for detection and quantification by Western  
50 blotting.

51           Another strategy for improving protein expression and folding involves optimisation of the  
52 expression plasmid and gene of interest. The natural variation in codon usage often reflects changes  
53 in translation speed needed for correct co-translational protein folding.<sup>4</sup> Changes in codon usage or  
54 expression host may lead to changes in the translation rate, cause mis-incorporation of amino acid  
55 residues and truncations of the protein due to premature termination of translation.<sup>5-8</sup> Structured  
56 parts of a protein may demand slower translation to enable co-translational folding, while more  
57 unstructured parts allow for more rapid translation.<sup>4</sup> Other factors to optimize include the choice of  
58 promoter, different mRNA secondary structures, optimal open reading frames, and avoidance of  
59 certain amino acid residues in the N- or C-terminal of the protein as they can be susceptible for  
60 proteolysis or prevent initiation of the translation process.<sup>9,10</sup> Furthermore, hydrophobic parts of the  
61 polypeptide chain are more prone to aggregation<sup>11</sup>, and truncation of unstructured hydrophobic parts

62 of the protein may thus improve protein folding. Additionally, computational methods can be used to  
63 predict protein variants with optimized improved folding and expression properties<sup>12</sup>.

64 A more efficacious way to improve protein expression would be to screen large random  
65 mutant libraries for variants of a protein with optimized folding. However, generation of random  
66 mutant libraries often results in frequent frame shift mutations and stop codons. When screening for  
67 mutants with improved folding, it is therefore necessary to exclude the large number of clones that  
68 no longer express the target protein or form aggregates. It would thus be desirable to screen  
69 simultaneously for folding and expression. Many such methods for the analysis of protein expression  
70 and folding require extraction of proteins from the production organism, separating the proteins into  
71 soluble (folded) and insoluble fractions, and analysing these fractions using SDS-PAGE or dot-blot  
72 based technologies<sup>13-15</sup>. These time-consuming processes are not amenable for screening of larger  
73 libraries of production organisms or protein variants at the single-cell level. Several bacterial systems  
74 have been developed for testing and screening variants for expression or stability. Examples include  
75 fusion reporter proteins for assessing protein folding and solubility using fluorescence, enzymatic  
76 reactions, antibiotic resistance or ligand binding as reporters for the production of soluble and folded  
77 proteins.<sup>16-20</sup> However, no system enables simultaneous monitoring of translation and folding at the  
78 single cell level.

79 Although proteins are generally able to fold into their native conformation by themselves,  
80 most organisms have evolved mechanisms for controlling and aiding the process, and preventing  
81 unproductive misfolding. Molecular chaperones are constitutively expressed and participate in *de*  
82 *novo* protein folding by stabilizing the nascent polypeptide chain on the ribosome, in protein

83 trafficking and domain assembly, and assist in degradation of partially folded and aggregated  
84 proteins. Several bacterial chaperones are induced when misfolded protein is expressed in the cell  
85 and their promoters may be used to drive stress induced heterologous protein expression<sup>21</sup>. Thus,  
86 chaperone promoters can be used to construct reporters for the presence of e.g. misfolded protein.  
87 Previous work has focused on coupling such promoters to the expression of luciferase<sup>22</sup> or beta-  
88 galactosidase<sup>23</sup>, which both require chemical assays for assessing their activity. Several methods are  
89 available for monitoring the level of protein production, such as it has been demonstrated using a  
90 translation-coupling system in *E. coli*<sup>24</sup>. None of the current methods, however, are suited for high-  
91 throughput approaches with simultaneous but independent *in vivo* monitoring of both translation and  
92 protein folding.

93         Here, we demonstrate a functional dual reporter system that enables single-cell monitoring of  
94 both protein translation levels and the degree of protein misfolding. The system can be used to  
95 analyse translation levels and folding properties of heterologously expressed proteins in *E. coli*. We  
96 demonstrate the use of the system for screening the expression levels of various proteins including  
97 the effect of different solubility tags. We further show how the system can be combined with  
98 fluorescence activated cell sorting (FACS) and next generation sequencing (NGS) in a deep mutational  
99 scanning experiment<sup>25</sup> for generating protein wide identification of mutations important for correct  
100 protein translation and folding. We find a good correlation between computationally calculated  
101 protein stability of mutant PARP1-BRCT proteins and experimental data. Furthermore, we show that  
102 the mutational experimental data obtained in this work can be used to select native-like structures

103 from a large pool of structures highlighting the usefulness of such systems in protein structure  
104 calculation.

105

## 106 **Results**

### 107 ***Dual-reporter system***

108 To enable high throughput analysis, we have developed a dual-reporter system that  
109 simultaneously monitors protein translation and protein folding at the single cell level (Figure 1A). The  
110 translation sensor consists of a translation coupling cassette comprised of a strong secondary mRNA  
111 structure formed by a C-terminal hexa-histidine tag, a stop codon for the gene of interest and a  
112 ribosome binding site (RBS) for a downstream fluorescent reporter protein, mCherry. The cassette has  
113 been inserted into a modified pET22b plasmid containing the pBR322 origin of replication (Figure 1B).  
114 When the gene of interest is correctly translated the secondary mRNA structure will be unfolded by  
115 ribosomal helicase activity, and expose the RBS for the downstream reporter gene enabling RNA  
116 polymerase to continue transcription.<sup>24</sup> An untimely termination of the translation will hinder the  
117 ribosome reaching the position of the mCherry gene, thus preventing a fluorescent signal to emerge.  
118 Correct translation of the gene of interest results in mCherry being expressed in a one to one ratio  
119 with the protein of interest.

120 The protein folding sensor is based on the naturally occurring heat shock response system in *E.*  
121 *coli*. Heat shock proteins (HSPs) are expressed to protect the cell when exposed to high temperatures  
122 or other form of stress conditions. HSPs are often molecular chaperones that bind the hydrophobic  
123 parts of partially unfolded proteins and assist in refolding and protection against degradation by

124 proteases. In *E. coli*, the alternative sigma factor, called RpoH, controls the transcription of several  
125 cytoplasmic HSPs, including the small inclusion body heat shock proteins, IbpA/B.<sup>26,27</sup> In an  
126 unstressed cell RpoH is bound to chaperone DnaK, but during stress RpoH will be released when DnaK  
127 binds unfolded protein, thus increasing the level of free RpoH in the cell. RpoH then binds to the RNA  
128 polymerase sigma70, which subsequently recognizes heat shock promoters and thus initiate a heat  
129 shock response. In our protein folding sensor, the RpoH inducible IbpA promoter is inserted upstream  
130 of a GFP reporter gene in a modified pSEVA631 vector<sup>28</sup> with the medium-copy pBBR1 origin of  
131 replication (Figure 1B). When the dual reporter system is used, the formation of misfolded protein  
132 and inclusion bodies will initiate expression from the IbpA promoter resulting in the expression of  
133 GFP.

#### 134 ***Effect of plasmid backbone and GFP variant on signal distribution***

135 To test whether the copy number affects the IbpAp-GFP activity, we have analysed the heat  
136 shock response from two vector backbones with the pBBR1 or the ColE1 origin of replication (ORI),  
137 respectively. The two ORIs were further tested in combination with two GFP-variants, GFP-mut3 and  
138 GFP-ASV. GFP-mut3 is a stable GFP-variant with a half-life estimated to more than one day, while a C-  
139 terminal degradation tag makes GFP-ASV susceptible to protease degradation and results in a shorter  
140 half-life of about 110 min.<sup>10</sup>

141 Cell cultures in the exponential growth phase were exposed to 42°C for 10 minutes to induce a  
142 cellular heat shock response. The heat shock response was followed by monitoring the GFP  
143 fluorescence for two hours (Figure 2A). Immediately after the exposure to 42°C, a rapid increase in  
144 GFP expressed from plasmids with the pBBR1 ORI was observed reaching a maximal level after 20

145 minutes. The GFP signal was consistent with the expected change in RpoH synthesis rate observed  
146 during a heat shock induced response, where the formation of misfolded protein is known to initiate a  
147 spike in the RpoH synthesis rate, that slowly declines to a level higher than before the heat shock.<sup>29</sup>  
148 The heat shock promoter under the control of the ColE1 ORI plasmid did not give rise to a heat shock  
149 response signal.

150         Since differentiation between heat shock induced and un-induced GFP responses is crucial for  
151 the applicability of the folding sensor, single cell analysis was carried out. FACS profiles of the heat  
152 induced and un-induced ColE1 plasmids show broad overlapping peaks, indicating a leaky expression  
153 of GFP (Figure 2B). The accumulation of GFP in the cell made it impossible to monitor a heat shock  
154 response signal different from the basal GFP level using the ColE1 based plasmids. In contrast, two  
155 sharp well-defined peaks were observed from the heat induced and un-induced pBBR1 plasmids with  
156 a 3-5-fold increase in the signal-to noise ratio. A significant increase was observed in the signal-to-  
157 noise ratio for the GFP-ASV variant combined with the pBBR1 backbone. The highly stable GFP-mut3  
158 slowly accumulates in the cell over time and results in higher GFP signals for both heat induced pBBR1  
159 and the control, thereby resulting in a lower signal-to-noise ratio. The short half-life of GFP-ASV  
160 prevented the basal accumulation of GFP in the cell, which enabled the distinction of the heat shock  
161 induced response from protein misfolding in single cells.

162         To test the compatibility of the translation sensor and the protein folding sensor, we chose to  
163 analyse two human proteins with differences in expression levels and solubility in *E. coli*, PARP1-BRCT  
164 and BRCA1-BRCT. PARP1-BRCT and BRCA1-BRCT contain the BRCT domain of human Poly[ADP-ribose]  
165 polymerase 1 (PARP1) and human breast cancer 1, early onset (BRCA1), respectively. The BRCA1-BRCT



166 construct was designed to promote misfolding by making a truncation of the folded BRCT domain.  
167 PARP1-BRCT was expressed in high yields as soluble protein in *E. coli* as shown by SDS-PAGE and  
168 Western blot analyses, while the BRCA1-BRCT domain was expressed as an insoluble protein in *E. coli*  
169 (Figure 2C).

170 Folding of PARP1-BRCT and BRCA1-BRCT was further analysed using pSEVA631(Sp)-IbpAp-GFP-  
171 ASV and pSEVA631(Sp)-IbpAp-GFP-mut3 as protein folding sensors and monitored by flow cytometry.  
172 As expected, the expression of the soluble PARP1-BRCT did not initiate a GFP response compared to  
173 the control carrying only an empty pET22b vector (Figure 2D). Overexpression of the insoluble BRCA1-  
174 BRCT, however, promoted binding of RpoH to the IbpA promoter region of the folding sensor,  
175 resulting in a 5 to 10-fold increase in GFP-signal compared to PARP1-BRCT. As previously observed,  
176 the GFP-ASV variant yielded a higher fluorescent signal, and a better signal-to-noise ratio compared to  
177 GFP-mut3 (Figure 2D). These results demonstrate the applicability of the protein folding sensor as a  
178 tool to monitor protein folding *in vivo*.

### 179 ***Effect of protein solubility tags on translation and folding***

180 Overexpression of recombinant proteins in *E. coli* often results in misfolded proteins and the  
181 formation of insoluble aggregates. To enhance the solubility, fusion proteins are often linked to the N-  
182 terminus of proteins that aggregates during expression. To test the applicability of the dual-reporter  
183 system to monitor the effects of linking solubility tags, we investigated the fusion of two commonly  
184 used expression tags, the N-utilization A (NusA) and the small ubiquitin related modifier (SUMO), on  
185 the translation levels and solubility of four different model proteins. The proteins were chosen based  
186 on their different translation levels and tendency to form inclusion bodies when expressed in *E. coli*,

187 and include PARP1-BRCT<sup>30</sup>, a truncated variant of BRCA1-BRCT<sup>31</sup>, the human cyclin-dependent kinase  
188 inhibitor, p19<sup>32</sup> and the viral oncogene E6 from human *papillomavirus type 16*<sup>33</sup>. Wild-type PARP1-  
189 BRCT, BRCA1-BRCT, E6, and p19 were cloned into the translation sensor with either NusA or SUMO  
190 linked to the N-terminus of the proteins. The translation and protein folding sensors were co-  
191 expressed at 30°C. Translation and protein folding were monitored by flow cytometry, while SDS-  
192 PAGE and Western blot analyses were used to compare the levels of expressed and soluble protein.  
193 We observed a strong correlation between translation levels monitored by flow cytometry and the  
194 expression yield detected by Western blot (Figure 3A). The N-terminally linked solubility tags did not  
195 have a large impact on the translation level of PARP1-BRCT, BRCA1-BRCT, and E6, which all expressed  
196 also without the tags, and the SUMO tag even decreased the expression level of BRCA1-BRCT. In  
197 contrast, under the given conditions wild type p19 did not express, however, fusion with either NusA  
198 or SUMO enabled expression, with NusA having a bigger effect.

199         The total amount of protein expressed and the fraction of soluble protein were quantified by  
200 Western blotting and compared to the GFP fluorescence from the protein folding sensor monitored  
201 by flow cytometry (Figure 3b). Expression of all PARP1-BRCT and the p19 variants resulted in  
202 background GFP fluorescence. In contrast BRCA1-BRCT and E6 expressed as insoluble aggregates and  
203 resulted in high GFP fluorescence. Different levels of GFP fluorescence were observed for BRCA1-  
204 BRCT and E6 although they both were expressed as insoluble protein. We also note that the fusion of  
205 the proteins to NusA or SUMO did not increase the amount of soluble protein, as also quantified by  
206 the folding sensor. The results demonstrate that it is possible to combine both biosensors to  
207 simultaneously investigate translation and proper folding of proteins in *E. coli*.

## 208 **Quantitative determination of protein stability and protein misfolding**

209 To test whether the folding sensor can be used to quantitatively measure protein stability and  
210 protein misfolding, six variants of the chymotrypsin inhibitor 2 (CI2) with different experimentally-  
211 determined thermodynamic stabilities ( $\Delta G_U$ )<sup>34</sup> were cloned into the translation sensor vector. CI2 is a  
212 serine protease that has been extensively used as a model protein in protein folding and stability  
213 studies<sup>34,35</sup>. The protein variants were expressed at 30°C using pSEVA631(Sp)-IbpAp-GFP-ASV as  
214 protein folding sensor. The GFP fluorescence monitored by flow cytometry was compared to the *in*  
215 *vitro* stability of the His-tagged proteins at 30°C determined by global fitting of temperature and  
216 denaturant unfolding. The GFP fluorescence clearly changed with  $\Delta G_U$ , where more stable proteins  
217 resulted in lower GFP signals (Figure 4). These results show that the GFP fluorescence arising from the  
218 protein folding sensor can be used as a proxy for the *in vitro* stability of variants in a mutant library.  
219 These results also suggest that the dual-reporter system can be used for analysis and sorting of  
220 mutant libraries using flow cytometry based on translation levels, and that it may enable the selection  
221 of proteins with altered stability.

## 222 ***Screening and sorting of protein wide mutant libraries***

223 Factors affecting proper folding of proteins can be investigated by random mutagenesis.  
224 However, stop-codons, frameshifts and indels will often be introduced in a randomly generated  
225 mutant library, which render it difficult and time-consuming to screen for new protein variants. We  
226 thus demonstrate the use of the dual-reporter system to screen for variants with either reduced or  
227 increased stability in a high-throughput mode. First, a randomly generated mutant library of pET22-  
228 PARP1-BRCT-mCherry was expressed with the protein folding sensor pSEVA631(Sp)-IbpAp-GFP-ASV to

229 demonstrate the applicability of the dual-reporter system to screen for new variants with correct  
230 translation but altered stability. PARP1-BRCT is a stable protein resulting in a low GFP signal and a  
231 signal distribution corresponding to the control. We created a mutant library and used the folding  
232 sensor to analyse positions and variation important for proper cellular folding. The mutant library was  
233 prepared using the error prone DNA polymerase Mutazyme II that provides a minimal mutational  
234 bias. By adjusting the amount of initial target DNA and the number of gene duplications, a mutation  
235 rate of 1-3 amino acid substitutions per protein was achieved. GFP and mCherry fluorescence was  
236 quantified by FACS one hour after protein expression was induced by IPTG (Figure 5A). PARP1-BRCT  
237 WT and the PARP1-BRCT mutant library showed a high translation level with well-defined mCherry  
238 signals that were distinct from the background fluorescence from an empty pET22b vector (Figure  
239 5A). Before sorting of the cells, similar GFP signals and distributions were obtained for PARP1-BRCT  
240 WT, the PARP1-BRCT mutant library, and the background control. The cell cultures were sorted using  
241 FACS for high mCherry signal (P1) alone and for both high mCherry signal (P1) and high GFP signal  
242 (P2). Gate 1 (P1) was defined as a mCherry signal higher than the control plasmid background, to  
243 ensure that only cells expressing correctly translated proteins were collected. Gate 2 (P2) was defined  
244 as the upper 1% of cells with the highest GFP fluorescence, in order to select for variants expressing  
245 proteins with decreased stability. The collected cells were grown and sorted again using the same  
246 criteria as in the initial sorting. The fluorescence from the final pools of sorted cells was analysed by  
247 FACS one hour and three hours after induction of protein expression by IPTG (Figure 5B). The PARP1-  
248 BRCT library sorted for high mCherry signal (Lib. P1) represents correctly translated proteins, and  
249 show similar GFP intensities and signal distributions as the PARP1-BRCT WT. The PARP1-BRCT library

250 sorted for both high mCherry signal and a high GFP signal (Lib. P2) shows a clear shift in GFP signal  
251 compared to PARP1-BRCT WT and the PARP1-BRCT library that was only sorted for correct translation  
252 (Lib. P1) (Figure 5B). The shift in GFP signals indicates that protein variants with impaired folding  
253 properties have been enriched. Furthermore, the PARP1-BRCT library sorted for high GFP  
254 fluorescence showed a small broadening of the GFP signal three hours after induction due to  
255 continuous expression of GFP concurrently with PARP1-BRCT being expressed. Single cells were  
256 extracted from the sorted libraries and the PARP1-BRCT gene was amplified by PCR and prepared for  
257 DNA amplicon sequencing.

#### 258 ***Mutant library sequencing, stability analysis and decoy detection***

259 The PARP1-BRCT mutant library was sequenced by NGS both before and after sorting into the  
260 two populations (red (Lib. P1) and green (Lib. P2)) using FACS (Figure 5C). For simplicity, we only  
261 investigated single site (amino acid) mutants. For a given mutant protein sequence, we compared its  
262 frequency in the green pool (destabilized proteins) with the frequency in the reference pool and used  
263 it as a proxy for protein stability. More specifically, for a given mutant protein sequence, we  
264 calculated the ratio between the high GFP fluorescence pool and the reference pool using Enrich2<sup>36</sup>  
265 that gives a score based on the normalized ratios. If the score is higher than 0 we consider the  
266 mutation to be neutral or stabilizing, and if the score was below 0, we consider it to be destabilizing  
267 (Figure 5C bottom). As expected, full saturation mutagenesis was not obtained due to the low  
268 mutagenesis rate that makes it unlikely to have more than one nucleotide change per codon.

269 We then turned to *in silico* calculations of the change in thermodynamic stability ( $\Delta\Delta G$ ) of the  
270 BRCT domain using FoldX<sup>37</sup> and a solution NMR structure (PDB ID: 2COK) to assess how well

271 predictions of thermodynamic stability correlate with the experimental data. We performed  
272 computational saturation mutagenesis in which we mutated each amino acid to all 19 other possible  
273 ones and calculated the change in stability (Figure 5C bottom), and considered  $\Delta\Delta G$  values greater  
274 than or equal to 3 kcal/mol to be destabilizing (red x in Figure 5C) and the remaining to be either  
275 neutral or stabilizing, to match the binary format of the sequencing data. Overall, we find a relatively  
276 low agreement between the FoldX calculations and the sequencing data, where destabilizing  
277 mutations based on the sequencing data (blue squares) are not always captured by FoldX. Enrich2  
278 only ranks the observed mutations and do not classify the mutations as either stabilizing or  
279 destabilizing, thus changing the Enrich2 cut-off may either increase false positives or false negatives.  
280 To reduce possible noise, we analysed the data position-wise by calculating the ratio between the  
281 number of destabilizing mutations and the number of total mutations for each position in the  
282 sequence ( $N_{\text{destab}}/N_{\text{total}}$ ) for both FoldX and the experimental sequencing data (Figure 5C top). The  
283 ratio is high when most mutations lead to destabilization and small when most mutations are  
284 neutral/stabilizing. From this analysis, we find a better correlation between the FoldX calculation and  
285 our experimental data (Figure 5C top). Note that for the FoldX calculations we have performed full  
286 saturation mutagenesis, which means that  $N_{\text{total}}$  is 19 for all positions, in contrast to the experimental  
287 data where  $N_{\text{total}}$  varies. To remove the bias of selecting the  $\Delta\Delta G$  cut-off for FoldX as well as  
288 summarizing across whole amino acid positions, we also performed a Receiver Operating  
289 Characteristic analysis (Figure 5D). Here, the sequencing data provides the mutation specific labels  
290 (blue vs green in Figure 5C) and the  $\Delta\Delta G$ s predicted from FoldX represent the predicted scores. From

291 this analysis, we obtained an area under the curve of 0.61 suggestive of a reasonable but non-perfect  
292 correlation between the calculated stabilities and the experimental sequencing data.

293         Decoy detection in a protein structural ensemble is useful for protein structure prediction  
294 when using structural prediction tools such as Rosetta<sup>38</sup>, which often produces a pool of candidate  
295 protein structures that might need additional filtering. Inspired by previous work that showed a  
296 correlation between the mutational tolerance of a site and how buried that site is in the protein  
297 structure<sup>39</sup>, we examined whether the results from the folding sensor could be used in decoy  
298 discrimination. We used the mean of the Enrich2 scores for each position to individually score a pool  
299 of 20,000 structures generated by Rosetta. The assumption was that for a given residue in a native  
300 protein structural model, the residue depth should correlate with the mean Enrich2 score calculated  
301 from our experiments<sup>39</sup>. As an example, we depict a protein structure where each residue is coloured  
302 either red or blue depending on their individual mean Enrich2 scores (Figure 5E). Here, we find that  
303 low Enrich2 scores are likely attributed to residues in the core of the protein. Intuitively, one can  
304 imagine that the deeper a residue is embedded in the native protein structure, the more likely it is to  
305 destabilize the protein upon mutation due to packing issues. For each BRCT model we thus calculated  
306 the Spearman's correlation coefficient,  $\rho$ , to quantify the correlation between the residue depth and  
307 mutational tolerance (mean Enrich2 score). This correlation coefficient is considered as a structure  
308 specific score for which a higher coefficient is suggestive of a more native-like protein. To examine its  
309 usefulness in separating high quality structures from low quality structure, we plotted  $\rho$  as a function  
310 of the structural Global Distance Test – Total Score (GDT-TS) of the 20,000 generated structures with  
311 respect to the first conformer in the PDB structure (Figure 5F). GDT-TS range from zero to one where

312 one corresponds to a native or near native structure and zero is likely an extended protein. In Figure  
313 5F, we find a clear correlation between the structural scores  $\rho$ , and the structural quality defined by  
314 GDT-TS, suggesting that our experimental data can indeed be used to identify likely structures in a  
315 pool of candidate structures.

### 316 ***Experimental validation of mutant variants identified through deep mutational scanning analysis***

317 From the deep mutational scanning we chose 20 variants for further analysis, of which 14  
318 mutations (G20V, G20W, A31T, I33N, G37E, G37R, G37W, G38R, C50Y, S52I, S52N, I72N, V74F, H97L)  
319 were suggested by the deep mutational scan to result in misfolding and 6 mutations (I33T, V74I,  
320 D78V, Q81R, A96P, A96V) that were found not to interfere with protein folding. The 20 variants were  
321 synthesized and introduced into the translation sensor plasmid and analysed using flow cytometry,  
322 and the protein concentration was quantified using Western blots (Figure 6). The translation levels  
323 detected by the mCherry signal and by Western blotting was comparable for 6 (A31T, I33T, D78V,  
324 Q81R, A96P, A96V) of the 20 variants (Figure 6A). Translation levels of the remaining 14 variants, of  
325 which 13 were predicted to misfold, were detected by a mCherry signal, but with either no translation  
326 level detected by Western blot, or with Western blot signals distinctly lower than what would be  
327 expected based on the mCherry signal. This suggests that these variants were translated correctly but  
328 possibly degraded by proteases in the cell before detection by Western blot. Moreover, lower GFP  
329 signals of variants with low or no translation level detected by Western blot, suggests that the  
330 proteins were degraded before chaperones were able to bind and protect the unfolded or partially  
331 unfolded protein (Figure 6B). The PARP1-BRCT I33N and G37E variants were predicted to misfold, but  
332 in contrast to the other variants, they were detectable by Western blotting, although still not at the



333 same level as the mCherry signal, suggesting that there was a significant difference in the degradation  
334 rate of the mutants. The corresponding high GFP signal shows that the stability of the PARP1-BRCT  
335 I33N and G37E variants was decreased as also predicted from the library sequencing data and the  
336 FoldX analysis. For the variants predicted not to interfere with protein stability, there was a  
337 correlation between the level of protein measured by mCherry fluorescence and the amount of  
338 protein quantified by Western blotting. This observation was corroborated by the low GFP signals  
339 demonstrating that the mutations do not decrease the stability. The percentage of soluble protein  
340 was further quantified, and visualized by Western blotting of the total protein fraction and the soluble  
341 protein fraction (Figure 6C). As expected, variants with high GFP signals have low fractions of soluble  
342 protein, whereas variants with low or no GFP signal have high fractions of soluble protein.

#### 343 ***Identification of mutants with increased stability***

344 Having demonstrated the potential of the dual reporter system for identifying residues  
345 important for protein folding, we expected that the reporter system can also be used to identify  
346 mutations that stabilize the folding of the protein. The PARP1-BRCT I33N variant was identified as a  
347 misfolded protein from the PARP1-BRCT library when screening for variants with decreased stability,  
348 and we asked which variants, if any, might suppress the effect of I33N. PARP1-BRCT I33N was thus  
349 used as a background for a new randomly generated mutant library with a mutation frequency of 1-3  
350 mutations per protein, which was then co-expressed with the protein folding sensor pSEVA631(Sp)-  
351 IbpAp-GFP-ASV. Single cells that had high translation levels (Gate 1) as well as increased protein  
352 stability (Gate 2) were sorted by FACS (Figure 7A, left panel). As expected PARP1-BRCT-I33N and the  
353 PARP1-BRCT-I33N mutant library resulted in significantly higher GFP signals than PARP1-BRCT-WT.

354 After the first round of sorting, 64 single clones with high mCherry and low GFP signal (Gate 1 + Gate  
355 2) were reanalysed by flow cytometry, and one of the clones (1.5%) had a GFP signal overlapping with  
356 the GFP signal for PARP1-BRCT-WT) (Sort 1, Figure 7B upper panel). After the second round of sorting,  
357 this population was further enriched to account for 12.5 % of cells (Sort 2, Figure 7B, lower panel)). A  
358 total of 64 clones were randomly selected from pool A and pool B and characterized by Sanger  
359 sequencing. Although the input library contains a wide range of mutations, all the selected clones  
360 were found to encode wild type PARP1-BRCT, except for one silent mutation, P10P, found after the  
361 second round of sorting. This mutation was caused by a codon change from CCA to CCT, neither of  
362 which are characterized as rare codons<sup>40</sup>. These results demonstrate that it is possible to select more  
363 stable and correctly folded variants by successive rounds of FACS. Our observations that only WT  
364 sequences were found after sorting for proteins with increased stability from a destabilized library is a  
365 likely result of the I33N mutation being a single nucleotide substitution making it likely to revert back  
366 to PARP1-BRCT WT. In addition, the most severely destabilizing single amino acid changes require  
367 multiple amino acid substitutions in order to recover or improve protein stability<sup>12</sup>. To increase the  
368 likelihood of finding more clones with increased stability, a library with a higher mutation frequency  
369 could be used. Still, our results show that it is possible to enrich the population of clones with low GFP  
370 clones and thus select for improved stability.

## 371 **Discussion**

372 The dual-reporter system presented here is a high-throughput screening method with fast and  
373 simultaneous monitoring of translation and protein folding at the single cell level. The setup has  
374 broad applicability and can be used as a screening tool to optimize expression conditions testing

375 different solubility and purification tags, as well as a tool in deep mutational scanning and directed  
376 evolution studies. The use of the small hexa-histidine tag for translational coupling to the reporter  
377 protein avoids a tag that would be likely to interfere with the three-dimensional structure of the  
378 protein and its function. Furthermore, the tag has the advantage that it can be used for down-stream  
379 quantification and purification steps.

380           Formation of inclusion bodies is often the bottleneck when expressing recombinant proteins in  
381 *E. coli*, and solubility tags or solubilisation of the inclusion bodies and subsequent refolding of the  
382 proteins are often necessary to recover folded and active proteins. In our reporter system, the GFP  
383 fluorescence is a result of a heat shock response initiated by the formation of aggregates and  
384 misfolded protein within the cell and is dependent on the presence of DnaK or DnaJ binding sites in  
385 the misfolded protein. The heat shock factor RpoH needed for binding to the *lbpAp* heat shock  
386 promoter on the protein folding sensor is released when DnaK binds the misfolded protein. The  
387 number of DnaK or DnaJ binding sites may influence the intensity of the GFP signal, as higher amounts  
388 of RpoH will be released with higher numbers of DnaK binding sites.

389           BRCA1-BRCT and E6 both expressed as insoluble proteins, but with different levels of GFP  
390 fluorescence. Using the Limbo DnaK binding site prediction tool<sup>41</sup>, BRCA1-BRCT and E6 are predicted  
391 to contain four and two DnaK binding sites, respectively. Assuming that all DnaK binding sites are  
392 exposed in the unfolded protein, this may explain the difference in GFP intensity between the two  
393 proteins. This suggests that the GFP fluorescence may not be comparable when investigating  
394 unrelated proteins. However, for variants of the same protein the GFP output can be used as a direct  
395 measure of protein stability as we have demonstrated for CI2.

396 Mutant libraries are a main component of deep mutational scanning and directed evolution  
397 studies. The major drawback of randomly generated mutant libraries is the introduction of frame-shift  
398 mutations, stop-codons and indels that alters the amino acid sequence and results in non-functional  
399 proteins. The incorporation of the translation sensor aims to differentiate between nonsense and  
400 missense mutations due to the necessity of complete termination of translation for a reporter signal  
401 to emerge.

402 Generation of mutant libraries using an error-prone DNA polymerase is limited by the genetic  
403 code, thus full saturation mutant libraries are difficult to obtain. Depending on the purpose of the  
404 experiment, the mutant libraries should be designed accordingly. Since multiple point mutations are  
405 often necessary for obtaining protein variants with improved overall stability, a mutant library for  
406 selecting stabilized variants should have a higher mutation frequency than a library for selecting  
407 destabilised variants. On the other hand, global analysis of libraries with different number of amino  
408 acid changes may provide detailed insight into protein folding and function<sup>42-44</sup>.

409 We have shown that the mutational profile can be used to provide insight into the structure of  
410 a protein through decoy detection. Very recently it has been shown that more extensive deep  
411 mutational scan can be used to determine accurate three-dimensional structures<sup>45,46</sup> and we envision  
412 that when the reporter system is used to select for stable protein variants it can be used in such  
413 structure-determination protocols.

414 Through screening for protein variants with improved stability from the destabilized PARP1-  
415 BRCT-I33N mutant, we successfully identified revertants to the wild type sequence, while a single  
416 silent mutation, PARP1-BRCT P10, was also identified. Where the amino acid sequence determines

417 the three-dimensional fold of a protein the nucleotide sequence may affect the translational rate and  
418 thus co-translational folding of the proteins. Silent mutations may therefore still improve protein  
419 solubility and stability.

420 All destabilized variants found in the PARP1-BRCT library are situated in the core of the protein  
421 fold, which is consistent with the core being more sensitive to mutation, which often also results in  
422 loss of function<sup>47</sup>. When mutating enzymes for improved translation levels and protein folding it  
423 involves a risk of altering the activity of the enzyme. It is known that mutations within or close to the  
424 catalytic sites of enzymes may result in an improved stability of the protein, but with a corresponding  
425 decrease in enzyme activity<sup>48,49</sup>. As the dual-reporter system can be used to obtain protein variants  
426 with high translation levels and high or moderate solubility, a downstream activity assay is needed to  
427 ensure an active enzyme. Activity assays, however, are generally protein specific and are difficult to  
428 incorporate in a generalized screening method.

#### 429 **Conclusion**

430 The presented dual-reporter biosensor system assesses *in vivo* protein translation and solubility with  
431 a reliable output. The use of a translation coupling cassette in the protein translation sensor makes it  
432 possible to avoid fusion of the reporter protein to the test protein, which reduces the risk of altering  
433 the protein folding properties. The dual-reporter system has been demonstrated to be generally  
434 applicable, since the protein folding sensor is based on the cellular heat shock response system,  
435 where measurable protein functions are not a prerequisite. The dual-reporter system can be used as a  
436 screening assay in directed evolution and deep mutational scanning studies to identify protein  
437 variants with high expression levels and improved protein stability in a high-throughput setup. By

438 applying next generation sequencing on mutant libraries, we demonstrate a good correlation  
439 between experiments and computational protein stability predictions. The dual-reporter system was  
440 capable of identifying mutations that were not correctly predicted by computational tools, and we  
441 therefore envision that the experimental data that can be generated using the system may be  
442 valuable for further improving computational stability predictions.

443

## 444 **Materials and Methods**

445

### 446 *Chemicals and enzymes*

447 Standard chemicals were purchase from Sigma Aldrich and sodium acetate was purchased from  
448 Scharlau, imidazole was purchased from PanReac AppliChem and IPTG was purchased from Fischer  
449 Bioreagents. Enzymes for standard cloning procedures were purchased from Thermo Fisher Scientific  
450 and New England Biolabs, respectively.

451

### 452 *Construction of a fluorescence-based protein folding reporter*

453 For construction of a protein folding sensor that reports on the formation of inclusion bodies (IB), the  
454 *lbpA* promoter (Genbank: LQ302077.1) from *E. coli* MG1655 was fused to either a stable (GFP-mut3;  
455 GenBank: LQ302079.1<sup>10</sup>) or a destabilized version of GFP (GFP-ASV; GenBank: LQ302078.1<sup>10</sup>). The  
456 GFP-ASV and GFP-mut3 were amplified by PCR using primer pairs and templates as indicated in Table  
457 S1 and Table S2. PCR products were cloned into pSEVA441 (GenBank: JX560339.1) using the *Xba*I and  
458 *Spe*I restriction sites, resulting in either pSEVA441-GFP-ASV or pSEVA441-GFP-mut3. The *E. coli* *lbpA*

459 promoter was amplified by PCR (Table S1) and cloned via the *PacI* and *XbaI* restriction sites into  
460 pSEVA441-lbpAp-GFP-ASV and pSEVA441-lbpAp-GFP-mut3, respectively. To generate pSEVA631(Sp)-  
461 lbpAp-GFP-ASV or pSEVA631(Sp)-lbpAp-GFP-mut3, the lbpAp-GFP reporter gene was subcloned via  
462 *PacI* and *SpeI* into the pSEVA631 (GenBank: JX560348.1). Finally, the gentamycin cassette of  
463 pSEVA631 was replaced by the spectinomycin cassette of pSEVA441 using the *SpeI* and *PshAI*  
464 restriction sites. All constructs were verified by Sanger sequencing.

465

#### 466 *Fusion of proteins with a fluorescent translation-sensor*

467 A set of proteins were fused to the translation coupling cassette<sup>24</sup> (GenBank: LQ302080.1) followed by  
468 mCherry (GenBank: LQ302081.1). The BRCT-domain of human Poly [ADP-ribose] polymerase 1  
469 (PARP1-BRCT, GenBank: LQ302082.1), a truncated version of BRCT-domain of human breast cancer 1,  
470 early onset (BRCA1-BRCT, GenBank: LQ302085.1 the human cyclin-dependent kinase 4 inhibitor D  
471 (p19, GenBank: LQ302086.1), and protein E6 from human *papillomavirus type 16* (GenBank:  
472 LQ302087.1) were amplified by PCR using the primers and templates as indicated in Table S1.  
473 Additionally, mCherry was amplified by PCR according to Table S1. Each protein encoding DNA  
474 fragment was assembled with the mCherry-PCR fragment and *NdeI* and *HindIII* digested pET22b  
475 vector (Novagen), using a Gibson assembly reaction (New England Biolabs). The resulting expression  
476 vectors pET22b-XXX-trans-mCherry (XXX stands for the respective protein; see also Table S2) comprise  
477 the coding sequence of the different proteins being linked via a C-terminal translation coupling  
478 cassette<sup>24</sup> to the open reading frame (ORF) of mCherry. All cloned constructs were confirmed by  
479 Sanger sequencing.

480

481 *Cloning of NusA and SUMO fusion proteins*

482 For analysing the impact of NusA and SUMO protein-tags on expression and translation levels of  
483 either PARP1-BRCT, BRCA1-BRCT, p19, or E6, proteins were N-terminally fused to NusA (GenBank:  
484 LQ302088.1) and SUMO (GenBank: LQ302089.1), respectively<sup>50,51</sup>. Thereby, NusA and SUMO were  
485 amplified by PCR using the primers indicated in Table S1 and inserted into pET22-XXX-trans-mCherry  
486 via the *NdeI* restriction site. The final protein expression reporter plasmids named pET22b-NusA-XXX-  
487 trans-mCherry and pET22b-SUMO-XXX-trans-mCherry (XXX stands for the respective protein; see also  
488 Table S2), respectively, were all verified by sequencing.

489

490 *Impact of plasmid copy number and GFP stability on protein folding reporter assay sensitivity*

491 The impact of the vector copy number and intracellular turnover rate of GFP, respectively, on the  
492 protein folding reporter system was analysed to optimize the readout sensitivity of the assay.  
493 Therefore, pSEVA631(Sp)-lbpAp-GFP-ASV and pSEVA631(Sp)-lbpAp-GFP-mut3 (pBBR1 origin), as well  
494 as pSEVA441-lbpAp-GFP-ASV and pSEVA441-lbpAp-GFP-ASV (ColE1 origin) (constructed as described  
495 above), were co-transformed with pET22b in *E. coli* Rosetta2<sup>TM</sup>(DE3)pLysS (Novagen®). Transformants  
496 were selected on LB plates containing 25 µg/mL chloramphenicol, 50 µg/mL spectinomycin, and 100  
497 µg/mL ampicillin. Single clones were inoculated in LB medium supplemented with the corresponding  
498 antibiotics and grown at 37°C and 300 rpm to an OD<sub>600</sub> of 0.5. IB formation in *E. coli* was induced by  
499 performing a heat-shock for 10 min at 42°C. After heat shock, cells were grown for an additional 2.5  
500 hours at 37°C and 300 rpm. Induction of the lbpAp promoter by IBs in single cells was monitored over



501 time by changes of the GFP signal using flow cytometry (Instrument: BD FACS-Aria™SORP cell sorter;  
502 Laser 1: 488 nm: >50 mW, Filter: 505LP, 530/30-nm FITC, Laser 2: 561 nm: >50 mW; Filter: 600LP,  
503 610/20-nm PE-Texas Red®). As control, the GFP signal in un-induced cells was monitored for each  
504 time point. The GFP (FITC-A, X-mean) values at each time point analysed using the FlowJo V10  
505 software were normalized to the corresponding background GFP signal.

506 To further investigate the impact of GFP stability on the sensitivity of the lbpAp-GFP reporter gene  
507 assay, pSEVA631(Sp)-lbpAp-GFP-ASV and pSEVA631(Sp)-lbpAp-GFP-mut3, respectively, were co-  
508 transformed with either pET22b, pET22-PARP1-BRCT-trans-mCherry or pET22-BRCA1-BRCT-trans-  
509 mCherry into *E. coli* Rosetta2™(DE3)pLysS (Novagen®). Transformants were selected on LB plates  
510 containing 25 µg/mL chloramphenicol, 50 µg/mL spectinomycin and 100 µg/mL ampicillin. Single  
511 clones were grown at 37°C and 300 rpm in LB medium supplemented with the corresponding  
512 antibiotics. At OD<sub>600</sub> of 0.5-0.7 the expression of the human proteins was induced by addition of 0.5  
513 mM IPTG. Directly after induction, the growth temperature was changed to 30°C. Induction of the  
514 lbpAp-GFP variants by misfolded proteins was analysed 1 hour after induction using flow cytometry as  
515 mentioned above. For data analysis the GFP-signal (FITC-A, X-mean) was normalized to the respective  
516 GFP-signal of the vector control.

517

#### 518 *Determination of protein localization by fractionated cell disruption*

519 Intracellular localization of proteins was further analysed by fractionated cell disruption. Here, cells  
520 (from 1 mL culture) were harvested either 1 hour (for immunoblot analysis) or 3 hours (for  
521 InstantBlue staining) after induction of protein expression. The cell pellet was resuspended in 50 µL

522 resuspension buffer (20 mM Tris-HCl pH 7.5, 150 mM NaCl; 10 mM EDTA, 1 x HP-protease inhibitor  
523 mix (Serva)) and cells were broken by repeated cycles of freeze and thaw. Afterwards, cells were  
524 adjusted to a final OD<sub>600</sub> of 5 in resuspension buffer supplemented with benzonase ( $\geq$  500 units;  
525 Sigma Aldrich). After 20 min incubation on ice, cells were spun-down for 1 min at 500 x g to remove  
526 cell debris. The supernatant containing all soluble and insoluble proteins was transferred to a fresh  
527 reaction tube. An aliquot of the supernatant was taken, representing the total protein fraction (total).  
528 The remaining cell lysate was spun-down for 15 min at 20,000 x g and the supernatant containing all  
529 soluble proteins was transferred into a new reaction tube (sol). The isolated fractions were separated  
530 on SDS-PAGE (RunBlue 4-20 %, Expedeon; NuPAGE® Bis-Tris gel 4-12%, Invitrogen) and analysed by  
531 InstantBlue staining (Expedeon) and quantitative immunoblotting using an anti-His antibody  
532 (Novagen).

533

534 *Dual reporter system for simultaneous monitoring of protein translation and folding in single E. coli*  
535 *cells*

536 To analyse the combined reporter system, pSEVA631(Sp)-lbpAp-GFP-ASV and the protein expression  
537 reporter plasmids (pET22b-XXX-trans-mCherry, pET22b-NusA-XXX-trans-mCherry, pET22b-SUMO-XXX-  
538 trans-mCherry) were co-transformed into chemically competent *E. coli* Rosetta2™(DE3)pLysS  
539 (Novagen®). Transformants were selected on LB plates containing 25 µg/mL chloramphenicol, 50  
540 µg/mL spectinomycin, and 100 µg/mL ampicillin. Single clones were grown in LB medium  
541 (supplemented with the corresponding antibiotics) at 37°C and 300 rpm to an OD<sub>600</sub> of 0.5-0.7 and  
542 expression of proteins was induced by addition of 0.5 mM IPTG. Directly after induction, the growth

543 temperature was changed to 30°C. Protein expression and folding was analysed 1 hour after induction  
544 using flow cytometry as mentioned above. For data analysis, GFP (FITC-A, X—mean) signal was  
545 normalized to the corresponding PARP1-BRCT signal.

546 To confirm signal of the translation reporter, protein expression levels were further analysed by  
547 instant blue staining and quantitative immunoblotting using an anti-His-Antibody. Cell-disruption was  
548 performed by freeze and thaw cycles as described before and the total protein fractions as well as  
549 intracellular localization of the proteins were analysed. Western Blot signal was quantified using the  
550 Image J software<sup>52</sup>.

551

#### 552 *Identification of PARP1-BRCT mutants with altered folding properties using FACS*

553 To generate a PARP1-BRCT mutant library the PARP1-BRCT domain was randomly mutated, aiming at  
554 a mutation rate of 1 to 3 mutations per construct, using the GeneMorph II random mutagenesis kit  
555 (Agilent) according to manufacturer's instructions. Primers and templates used for the reactions are  
556 indicated in Table S1. A megawhop reaction was performed with the random mutated PCR product as  
557 megaprimer and pET22-PARP1-BRCT-trans-mCherry as template. The resulting linear DNA fragments  
558 were transformed into MegaX DH10B™ T1R Electrocomp™ cells (Invitrogen) and transformants were  
559 selected on LB plates supplemented with 100 µg/mL ampicillin. The colonies (library size >100,000)  
560 were pooled and the plasmids were directly purified without further growth.

561 The vectors pET22b, pET22-PARP1-BRCT-trans-mCherry, and the created pET22-PARP1-BRCT-trans-  
562 mCherry mutant library were transformed into electro-competent Rosetta2(DE3)pLysS cells  
563 harbouring the protein folding sensor (pSEVA631(Sp)-IbpAp-GFP-ASV). After recovery, transformants

564 were directly inoculated into 2 mL LB medium containing 20 µg/mL chloramphenicol, 50µg/mL  
565 spectinomycin, 100 µg/mL ampicillin, and grown overnight at 37°C and 300 rpm. Cells were  
566 transferred into fresh medium and grown at 37°C and 300 rpm to an OD<sub>600</sub> of 0.5 – 0.7. Expression of  
567 proteins was induced by addition of 0.5 mM IPTG and the growth temperature of the culture was  
568 shifted to 30°C. 1 hour after induction, cells were analysed by flow cytometry as mentioned above.  
569 150.000 cells expressing a PARP1-BRCT mutant protein at wildtype level based on the translation  
570 sensor signal (Figure 5A, gate 1), and which had an increased GFP signal (Figure 5A, Gate 2) were  
571 sorted into 1 mL LB medium supplemented with antibiotics and grown overnight at 37°C and 300 rpm.  
572 To further enrich the *E. coli* fraction harboring proteins with altered folding properties, another round  
573 of protein expression and sorting (150.000 events) was carried out as described above.  
574 The following day, the sorted cell population was again analysed 1 hour after induction of protein  
575 expression by flow cytometry. Subcellular localization of proteins in the sorted *E. coli* fraction was  
576 analysed by Immunoblotting using an anti-His antibody as described above.  
577 For next generation sequencing, plasmids were isolated from the sorted *E. coli* population. As control,  
578 plasmids were isolated from the PARP1-BRCT mutant library, which was used as starting material for  
579 sorting. Two 300 bp DNA fragments were amplified from the PARP1-BRCT library using a high fidelity  
580 polymerase (primers as indicated in Table S1). The amplified fragments were purified using AMPure  
581 XP beads (Beckman Coulter) to remove free primers and primer-dimer species. Both PCR-products  
582 were mixed in a one-to-one ratio.  
583 Next, a PCR reaction was performed to attach Illumina sequencing adapters (Nextera XT Index Kit,  
584 Illumina) to the DNA fragments. For the reaction a KAPA HiFi HotStart Polymerase (Kapa Biosystems)

585 was used. The resulting PCR products were purified with AMPure XP beads. The product size of the  
586 PCR reaction was verified on a Bioanalyzer DNA 1000 chip and the DNA was quantified using a Qubit®  
587 2.0 Fluorometer. DNA fragments were normalized to 10nM in 10mM Tris pH8.5, 0.1% Tween 20. In  
588 order to reduce the background signal, the sample was spiked with 5% Phi-X control DNA (Illumina).  
589 The DNA was loaded onto the flow cell provided in the MiSeq Reagent kit v2, subjected to 300 cycles  
590 (Illumina), and sequenced on a MiSeq sequencing system (Illumina).

591

#### 592 *Enrichment analysis*

593 The analysis was carried out using Enrich2 software<sup>36</sup>. However, due to issues running Enrich2 directly  
594 from raw fastq files, we converted the fastq files into Enrich2 compatible variant counts using python  
595 scripts. The scripts for doing this as well as an Enrich2 analysis config file are available at  
596 <https://doi.org/10.11583/DTU.10265420>. The script does the following: Reads were merged using  
597 FLASH v.1.2.11<sup>53</sup> and mapped to the reference sequence using bowtie2 v.2.3.4.1<sup>54</sup>. The SAM files that  
598 bowtie2 outputs are then parsed to create Enrich2 compatible variant count files.

599

#### 600 *Folding properties of PARP1-BRCT single mutants*

601 To generate PARP1-BRCT single mutants, a 2-fragment Gibson assembly reaction was performed. For  
602 each single mutant two overlapping DNA fragments were amplified by PCR using pET22b-PARP1-  
603 BRCT-trans-mCherry as template. Primer pairs are listed in Table S3. Finally, the two DNA fragments  
604 were joined using Gibson Assembly® Cloning Kit (New England Biolabs) according to manufacturer's

605 instructions. The sequence of each single mutant was confirmed by sequencing. Resulting mutant  
606 constructs are listed in Table S3.

607 To examine the translation levels and protein stability of PARP1-BRCT single mutants, each mutant  
608 construct (Table S3) was co-transformed with pSEVA631(Sp)-IbpAp-GFP-ASV into chemically  
609 competent *E. coli* Rosetta2™(DE3)pLysS (Novagen®). Protein expression was induced by addition of  
610 IPTG and protein translation and folding were analysed by flow cytometry and quantitative  
611 immunoblotting as described before. To determine the percentage of soluble protein, the western  
612 blot signal was quantified using the Image J software.

613

614 *Isolation of PARP1-BRCT-I33N single mutants with rescued folding properties using the dual reporter*  
615 *system*

616 A PARP1-BRCT-I33N library was generated as described before, using pET22b-PARP1-BRCT-I33N-trans-  
617 mCherry as template. The plasmids pET22b, pET22-PARP1-BRCT-I33N-trans-mCherry and the created  
618 pET22-PARP1-BRCT-I33N-trans-mCherry mutant library were transformed into electro-competent  
619 Rosetta2(DE3)pLysS cells harbouring the protein folding sensor (pSEVA631(Sp)-IbpAp-GFP-ASV).  
620 Protein expression was induced with IPTG and flow cytometry was performed as described above. 64  
621 single clones that show protein expression (Figure 7A, Pool 1, Gate 1) in combination with a  
622 decreased GFP signal (Figure 7A, Pool 1; Gate 2) were sorted in 200 µl LB medium supplemented with  
623 antibiotics and grown to stationary phase at 37°C and 300 rpm. To further enrich the *E. coli* fraction  
624 harbouring proteins with rescued folding properties, a pool of 150,000 cells was sorted (identical  
625 gating as single clones) into 1 mL LB medium supplemented with antibiotics and grown again

626 overnight at 37°C and 300 rpm. Subsequently, a second round of IPTG induction and sorting was  
627 performed to gain another 64 single clones (Figure 7A, Pool 2; Gate 1 and 2). To verify GFP signal, all  
628 single clones (Pool 1 and Pool 2) were inoculated into fresh medium, protein expression was induced,  
629 and GFP expression was analysed using a BD LSRFortessa™ cell analyser in the HTS mode (Laser 1: 488  
630 nm: >50 mW, Filter: 505LP, 530/30-nm FITC). Finally, plasmids were isolated from single clone  
631 cultures, which showed no GFP signal after induction, and analysed by Sanger sequencing.

632

### 633 *FACS-based CI2 stability assay*

634 To generate five CI2 mutants with varying stabilities, Site-Directed II Lightning mutagenesis kit (Agilent  
635 Technologies) was used with CI2 WT as template. Each mutant was amplified by PCR using primer  
636 pairs as indicted in Table S1. PCR products were cloned into pET22b-mCherry vector using the *NdeI*  
637 and *SpeI* restriction sites and joined using Gibson Assembly® Cloning Kit (New England Biolabs)  
638 according to manufacturer's instructions.

639 The CI2 variants were co-transformed with pSEVA631(Sp)-IbpAp-GFP-ASV into Rosetta2 (DE3) pLysS  
640 chemically competent cells and expressed in 50 ml LB media supplemented with 100 µg/µl ampicillin,  
641 25 µg/ml chloramphenicol, and 50 µg/ml spectinomycin at 30°C, 250 rpm to an OD<sub>600</sub> of 0.8. Protein  
642 expression was induced with 0.5 mM IPTG. Cells were extracted before and 1 hour after induction and  
643 kept on ice until FACS analysis. The mCherry and GFP fluorescence was analysed on a BD FACS-  
644 ARIA™SORP cell sorter as mentioned above.

645

646 *CI2 expression and purification for stability measurements*

647 CI2 variants transformed into Rosetta2 (DE3) pLysS competent cells and expressed in 1 L LB in the  
648 presence of 100 µg/µL ampicillin and 25 µg/ml chloramphenicol at 37°C. Protein expression was  
649 induced at OD<sub>600</sub>~0.5-0.7 with 0.5 mM IPTG and cells were further grown at 30°C for 4-5 hours. Cells  
650 were harvested by centrifugation at 5,000 x g for 20 min. Cell pellets were resuspended in 20 mL  
651 buffer A (20 mM sodium acetate pH 5.3) and frozen at -20°C. Cell lysis was performed by 2 rounds of  
652 sonication (1 min, 80% amplitude, 0.5 cycles, (Hielscher UP200S)) followed by 30 min incubation on  
653 ice in presence of 1 mg DNase. Cell debris and protein aggregates were removed by centrifugation at  
654 20,000 x g, 4°C for 30 min. The supernatants were loaded onto a 1 mL HisTrap HP column (GE  
655 Healthcare) equilibrated with buffer A, and eluted with a gradient of buffer B (20 mM sodium acetate  
656 pH 5.3, 1 M imidazole) from 0-100 %. Fractions containing CI2 determined from SDS-PAGE analysis  
657 were concentrated and loaded onto a superdex75 10/300 GL column (GE Healthcare) equilibrated  
658 with 20 mM sodium phosphate pH 7.4, 150 mM NaCl. For buffer exchange the samples were  
659 concentrated and loaded onto a superdex75 10/300 GL column equilibrated with 50 mM MES pH  
660 6.25. The purity of the proteins was assessed by SDS-PAGE and the protein concentration was  
661 determined using a spectrometer (PerkinElmer lambda40) with an extinction coefficient of 6990 M<sup>-1</sup>  
662 cm<sup>-1</sup>.

663 The CI2 variants were diluted to 10 µM in MES pH 6.25 with or without 6 M guanidium chloride. Using  
664 both solutions a dilution series of guanidium chloride ranging from 0 – 6 M guanidium chloride was  
665 prepared. Intrinsic tryptophan and tyrosine fluorescence of the CI2 variants was measured in  
666 triplicates using nanoDSF technologies on a Prometheus NT.48 instrument (nanoTemper



667 technologies) with a temperature range from 15-95°C with 1°C/min increments. Global fitting of the  
668 temperature and denaturant unfolding was performed using the 330 and 360 nm fluorescence and  
669  $\Delta G_U$  and was obtained.

670

671 *Generating and scoring decoy structures.*

672 We generated 20,000 decoy structures using Rosetta's threading protocol<sup>38</sup> with PDBID: 2COK  
673 (Solution structure of BRCT domain of poly(ADP-ribose) polymerase-1) as a template. As a means to  
674 score a given decoy structure, we calculated the spearman's correlation coefficient  $\rho$  between the  
675 residue depths of the decoy structure and the mean Enrich2 positional score for the corresponding  
676 positions in the sequence.

677

## 678 **Acknowledgements**

679 This work was supported by the Novo Nordisk Foundation through a grant to DTU Biosustain  
680 (NNF10CC1016517) as well as through grants for Protein OPTimization (POP) (NNF15OC0016360), a  
681 Hallas-Møller stipend (R173-A14446) and a project grant from the Lundbeck Foundation (R126-2012-  
682 12589). The pSEVA plasmids were a kind gift of Professor de Lorenzo, Centro Nacional de  
683 Biotecnologia-CSIC, Spain.

## 684 **Author contributions**

685 AZ, LH, MK, KT, KLL, ATN designed the experimental work, AZ, LH, AK, MK performed the experiments,  
686 AZ, EP, LH, LEP, MK, KT, KLL, ATN analysed the data, LH, AZ wrote the manuscript, LH, AZ, MK, KT, KLL,  
687 ATN edited and reviewed the manuscript, and all authors read and approved the final manuscript.

688 **Additional information**

689 Supplementary Information accompanies this paper can be found at...

690

691 **Competing interests:** AZ and ATN have filed a provisional application on this work.

692

693 **References**

- 694 1. Costa, S., Almeida, A., Castro, A. & Domingues, L. Fusion tags for protein solubility, purification,  
695 and immunogenicity in *Escherichia coli*: the novel Fh8 system. *Front. Microbiol.* **5**, 1–20 (2014).
- 696 2. Marblestone, J. G. *et al.* Comparison of SUMO fusion technology with traditional gene fusion  
697 systems: Enhanced expression and solubility with SUMO. *Protein Sci.* **15**, 182–189 (2006).
- 698 3. Carson, M., Johnson, D. H., McDonald, H., Brouillette, C. & DeLucas, L. J. His-tag impact on  
699 structure. *Acta Crystallogr. Sect. D Biol. Crystallogr.* **63**, 295–301 (2007).
- 700 4. Angov, E. Codon usage : Nature ' s roadmap to expression and folding of proteins. *Biotechnol. J.*  
701 **6**, 650–659 (2011).
- 702 5. Komar, A. A., Lesnik, T. & Reiss, C. Synonymous codon substitution affects ribosome traffic and  
703 protein folding during in vitro translation. *FEBS Lett.* **462**, 387–391 (1999).
- 704 6. Yu, C. H. *et al.* Codon Usage Influences the Local Rate of Translation Elongation to Regulate Co-  
705 translational Protein Folding. *Mol. Cell* **59**, 744–754 (2015).
- 706 7. Fedorov, a. N. Cotranslational Protein Folding - Minireview. *J. Biol. Chem.* **272**, 32715–32718  
707 (1997).
- 708 8. Sørensen, H. P. & Mortensen, K. K. Advanced genetic strategies for recombinant protein

- 709 expression in *Escherichia coli*. *J. Biotechnol.* **115**, 113–128 (2005).
- 710 9. Humbard, M. A., Surkov, S., De Donatis, G. M., Jenkins, L. M. & Maurizi, M. R. The N-degradome  
711 of *Escherichia coli*: Limited proteolysis in vivo generates a large pool of proteins bearing N-  
712 degrons. *J. Biol. Chem.* **288**, 28913–28924 (2013).
- 713 10. Anders, J. B. *et al.* New Unstable Variants of Green Fluorescent Protein for Studies of Transient  
714 Gene Expression in Bacteria. *Appl. Environ. Microbiol.* **64**, 2240–2246 (1998).
- 715 11. Soto, C. *et al.* Solubility As Function of Proteins Structure and Solvent Components. *Nat. Med.* **4**,  
716 822–826 (1998).
- 717 12. Goldenzweig, A. *et al.* Automated Structure- and Sequence-Based Design of Proteins for High  
718 Bacterial Expression and Stability. *Mol. Cell* **63**, 337–346 (2016).
- 719 13. Shih, Y. *et al.* High-throughput screening of soluble recombinant proteins. *Protein Sci.* **11**, 1714–  
720 1719 (2002).
- 721 14. Vincentelli, R., Canaan, S., Julien, O. V, Cambillau, C. & Bignon, C. Automated expression and  
722 solubility screening of His-tagged proteins in 96-well format. *Anal. Biochem.* **346**, 77–84 (2005).
- 723 15. Wang, Z. *et al.* Coupled selection of protein solubility in *E. coli* using uroporphyrinogen III  
724 methyltransferase as red fluorescent reporter. *J. Biotechnol.* **186**, 169–174 (2014).
- 725 16. Waldo, G. S., Standish, B. M., Berendzen, J. & Terwilliger, T. C. Rapid protein-folding assay using  
726 green fluorescent protein. *Nature* **17**, 691–695 (1999).
- 727 17. Sachsenhauser, V. & Bardwell, J. C. Directed evolution to improve protein folding in vivo. *Curr.*  
728 *Opin. Struct. Biol.* **48**, 117–123 (2018).
- 729 18. Klesmith, J. R., Bacik, J.-P., Wrenbeck, E. E., Michalczyk, R. & Whitehead, T. A. Trade-offs

- 730 between enzyme fitness and solubility illuminated by deep mutational scanning. *Proc. Natl.*  
731 *Acad. Sci.* **114**, 2265–2270 (2017).
- 732 19. Foit, L. *et al.* Optimizing Protein Stability In Vivo. *Mol. Cell* **36**, 861–871 (2009).
- 733 20. Araya, C. L. *et al.* A fundamental protein property, thermodynamic stability, revealed solely  
734 from large-scale measurements of protein function. *Proc. Natl. Acad. Sci.* **109**, 16858–16863  
735 (2012).
- 736 21. Lesley, S. A., Graziano, J., Cho, C. Y., Knuth, M. W. & Klock, H. E. Gene expression response to  
737 misfolded protein as a screen for soluble recombinant protein. *Protein Eng. Des. Sel.* **15**, 153–  
738 160 (2002).
- 739 22. Kraft, M. *et al.* An online monitoring system based on a synthetic sigma32-dependent tandem  
740 promoter for visualization of insoluble proteins in the cytoplasm of Escherichia coli. *Appl.*  
741 *Microbiol. Biotechnol.* **75**, 397–406 (2007).
- 742 23. Schultz, T., Martinez, L. & de Marco, A. The evaluation of the factors that cause aggregation  
743 during recombinant expression in E. coli is simplified by the employment of an aggregation-  
744 sensitive reporter. *Microb. Cell Fact.* **5**, 1–9 (2006).
- 745 24. Mendez-Perez, D., Gunasekaran, S., Orlor, V. J. & Pflieger, B. F. A translation-coupling DNA  
746 cassette for monitoring protein translation in Escherichia coli. *Metab. Eng.* **14**, 298–305 (2012).
- 747 25. Fowler, D. M. & Fields, S. Deep mutational scanning: a new style of protein science. *Nat.*  
748 *Methods* **11**, 801–7 (2014).
- 749 26. Allen, S. P., Polazzi, J. O., Gierse, J. K. & Easton, A. M. Two novel heat shock genes encoding  
750 proteins produced in response to heterologous protein expression in Escherichia coli. *J.*

- 751 *Bacteriol.* **174**, 6938–6947 (1992).
- 752 27. Chuang, S. E., Burland, V., Plunkett, G., Daniels, D. L. & Blattner, F. R. Sequence analysis of four  
753 new heat-shock genes constituting the *hsITS/ibpAB* and *hslVU* operons in *Escherichia coli*. *Gene*  
754 **134**, 1–6 (1993).
- 755 28. Silva-Rocha, R. *et al.* The Standard European Vector Architecture (SEVA): A coherent platform  
756 for the analysis and deployment of complex prokaryotic phenotypes. *Nucleic Acids Res.* **41**,  
757 666–675 (2013).
- 758 29. Grossman, A. D., Straus, D. B. & Walter, W. A.  $\sigma$ 32 synthesis can regulate the synthesis of  
759 heat shock proteins in *Escherichia coli*. *Genes Dev.* **1**, 179–184 (1987).
- 760 30. Langelier, M., Servent, K. M., Rogers, E. E. & Pascal, J. M. A Third Zinc-binding Domain of  
761 Human Poly ( ADP-ribose ) Polymerase-1 Coordinates DNA-dependent Enzyme Activation. *J.*  
762 *Biol. Chem.* **283**, 4105–4114 (2008).
- 763 31. Rowling, P. J. E., Cook, R. & Itzhaki, L. S. Toward classification of BRCA1 missense variants using  
764 a biophysical approach. *J. Biol. Chem.* **285**, 20080–20087 (2010).
- 765 32. Luh, F. Y. *et al.* Structure of the cyclin- dependent kinase. *Lett. to Nat.* **389**, 999–1003 (1997).
- 766 33. Zanier, K. *et al.* Formation of well-defined soluble aggregates upon fusion to MBP is a generic  
767 property of E6 proteins from various human papillomavirus species. *Protein Expr. Purif.* **51**, 59–  
768 70 (2007).
- 769 34. Itzhaki, L. S., Otzen, D. E. & Fersht, a R. The structure of the transition state for folding of  
770 chymotrypsin inhibitor 2 analysed by protein engineering methods: evidence for a nucleation-  
771 condensation mechanism for protein folding. *J. Mol. Biol.* **254**, 260–288 (1995).

- 772 35. Jackson, S. E. & Fersht, A. R. Folding of chymotrypsin inhibitor 2. 1. Evidence for a two-state  
773 transition. *Biochemistry* **30**, 10428–10435 (1991).
- 774 36. Rubin, A. F. *et al.* A statistical framework for analyzing deep mutational scanning data. *Genome*  
775 *Biol.* **18**, 1–15 (2017).
- 776 37. Guerois, R., Nielsen, J. E. & Serrano, L. Predicting changes in the stability of proteins and  
777 protein complexes: A study of more than 1000 mutations. *J. Mol. Biol.* **320**, 369–387 (2002).
- 778 38. Raman, S. *et al.* Structure prediction for CASP8 with all-atom refinement using Rosetta. *Proteins*  
779 **77**, 89–99 (2009).
- 780 39. Adkar, B. V *et al.* Protein model discrimination using mutational sensitivity derived from deep  
781 sequencing. *Structure* **20**, 371–381 (2012).
- 782 40. Zhang, S., Zubay, G. & Goldman, E. Low-usage codons in Escherichia, yeast, fruit fly and  
783 primates. *Gene* **105**, 61–72 (1991).
- 784 41. Van Durme, J. *et al.* Accurate prediction of DnaK-peptide binding via homology modelling and  
785 experimental data. *PLoS Comput. Biol.* **5**, (2009).
- 786 42. Sarkisyan, K. S. *et al.* Local fitness landscape of the green fluorescent protein. *Nature* **533**, 397–  
787 401 (2016).
- 788 43. Otwinowski, J. Biophysical inference of epistasis and the effects of mutations on protein  
789 stability and function. *Mol. Biol. Evol.* **35**, 2345–2354 (2018).
- 790 44. Nisthal, N. *et al.* Protein stability engineering insights revealed by domain-wide comprehensive  
791 mutagenesis. *bioRxiv Biochem.* 1–48 (2018). doi:10.1101/484949
- 792 45. Schmiedel, J. M. & Lehner, B. Determining protein structures using deep mutagenesis. *Nat.*

- 793            *Genet.* **51**, (2019).
- 794    46.    Rollins, N. J. *et al.* Inferring protein 3D structure from deep mutation scans. *Nat. Genet.* **51**,  
795            (2019).
- 796    47.    Tokuriki, N., Stricher, F., Schymkowitz, J., Serrano, L. & Tawfik, D. S. The Stability Effects of  
797            Protein Mutations Appear to be Universally Distributed. *J. Mol. Biol.* **369**, 1318–1332 (2007).
- 798    48.    Beadle, B. M. & Shoichet, B. K. Structural bases of stability-function tradeoffs in enzymes. *J.*  
799            *Mol. Biol.* **321**, 285–296 (2002).
- 800    49.    K. Shoichet, B., A. Baase, W., Kuroki, R. & W. Matthews, B. A relationship between protein  
801            stability and protein function. *Proc. Natl. Acad. Sci. U. S. A.* **92**, 452–456 (1995).
- 802    50.    Butt, T. R., Edavettal, S. C., Hall, J. P. & Mattern, M. R. SUMO fusion technology for difficult-to-  
803            express proteins. *Protein Expr. Purif.* **43**, 1–9 (2005).
- 804    51.    Davis, G. D., Elisee, C., Newham, D. M. & Harrison, R. G. New Fusion Protein Systems Designed  
805            to Give Soluble Expression in Escherichia coli. *Biotechnol. Bioeng.* **65**, 382–388 (1999).
- 806    52.    Schneider, C. A., Rasband, W. S. & Eliceiri, K. W. NIH Image to ImageJ : 25 years of Image  
807            Analysis. *Nat. Methods* **9**, 671–675 (2012).
- 808    53.    Magoc, T. & Salzberg, S. L. FLASH : fast length adjustment of short reads to improve genome  
809            assemblies. *Bioinformatics* **27**, 2957–2963 (2011).
- 810    54.    Langmead, B. & Salzberg, S. L. Fast gapped-read alignment with Bowtie 2. *Nat. Methods* **9**, 357–  
811            360 (2012).
- 812
- 813

814

815

**a**

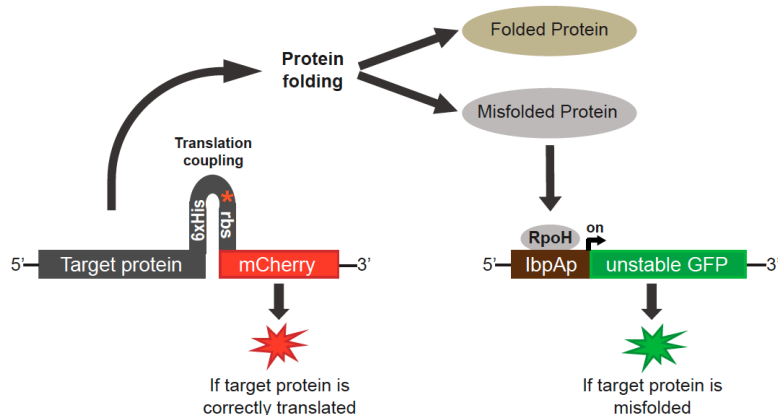

**b**

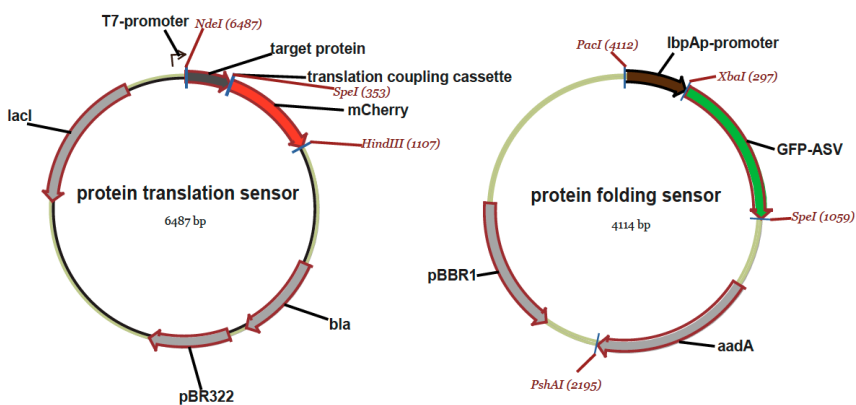

816

817

818 **Figure 1:** Schematic overview of a dual-reporter system with simultaneous monitoring of protein  
819 translation and protein folding at the single cell level. (a) The translation sensor is comprised of the  
820 gene of interest translationally coupled to the reporter protein mCherry. When the target gene is  
821 correctly translated, the RNA polymerase unfolds the secondary structure and the mCherry gene is  
822 transcribed resulting in a red fluorescent signal. The synthesized polypeptide chain then either folds



823 into a soluble protein conformation or it fails to fold, thereby typically forming protein aggregates  
824 that accumulate as inclusion bodies. Formation of inclusion bodies increases the cellular level of RpoH  
825 (heat shock sigma-factor  $\sigma^{32}$ ). RpoH binds to the lbpA promoter in the protein folding sensor, initiating  
826 the expression of an unstable GFP variant, GFP-ASV yielding a green fluorescent signal. (b) Overview  
827 of the plasmids used for the protein translation and protein folding sensors.  
828

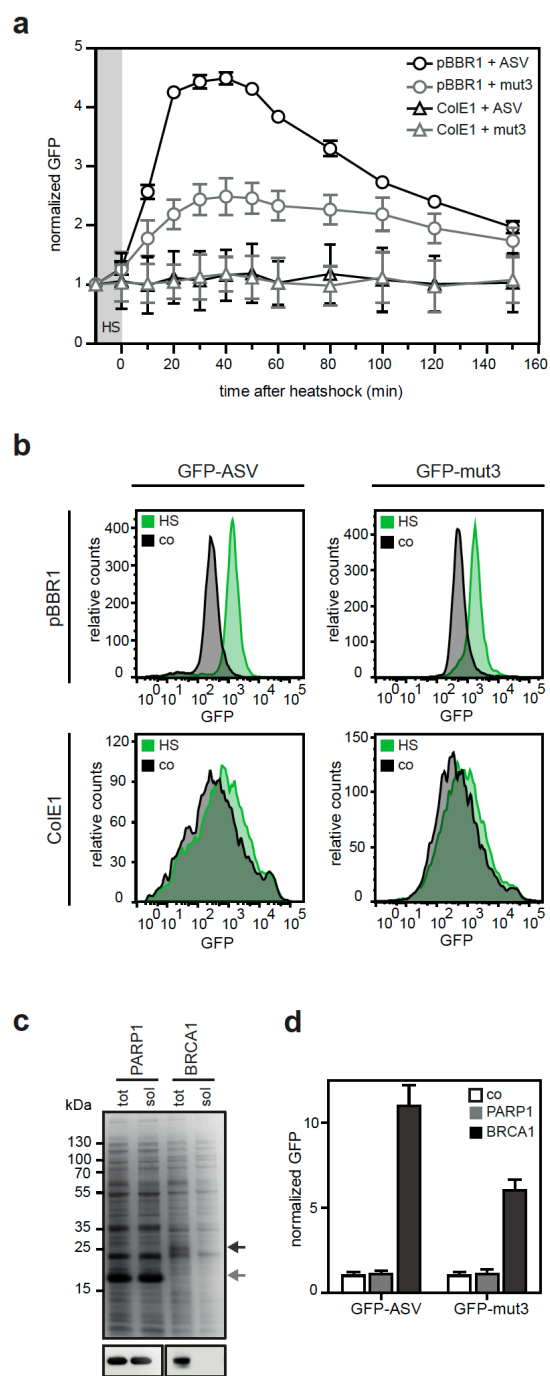

829

830

831 **Figure 2:** Optimization of the protein folding sensor plasmid to improve differentiation of heat shock

832 response signals. (a) Monitoring of the heat shock response signals of protein folding sensors

833 (pSEVA441-lbpAp and pSEVA631(Sp)-lbpAp) with different origin of replications (ColE1 and pBBR1,  
834 respectively) and GFP variants (GFP-mut3 and GFP-ASV) after induction of the lbpA promoter.  
835 Changes in the GFP signal after induced heat shock (HS) are monitored using flow cytometry and the  
836 GFP signals in triplicates (average  $\pm$  SD) are normalized to the respective background signal at each  
837 time-point. (b) FACS profiles for the GFP signals 60 min after induced heat shock for GFP-mut3 and  
838 GFP-ASV in plasmids with different origin of replications. Relative counts of GFP fluorescence  
839 intensities are shown from the analysis of 10,000 single cells. The heat shock induced (HS) GFP  
840 variants expressed from pBBR1 (pSEVA631(Sp)-lbpAp) shows well-defined and distinct peaks, which  
841 are easy to distinguish from the un-induced control plasmids (co). The GFP variants expressed from  
842 ColE1 (pSEVA441-lbpAp) resulted in very broad and not well-defined peaks making it difficult to  
843 distinguish between the heat shock induced plasmids and the control. (c) SDS-PAGE and immunoblot  
844 analysis of total (tot) protein yield and soluble protein (sol) after fractionated cell disruption of two  
845 human proteins, PARP1-BRCT and a truncated version of BRCA1-BRCT, shows high expression of a  
846 soluble PARP1-BRCT protein, and an insoluble BRCA1-BRCT protein. (d) Flow cytometry analysis 60  
847 min after protein induction of the co-expression of PARP1-BRCT and BRCA1-BRCT with the  
848 pSEVA631(Sp)-lbpAp-GFP-ASV and pSEVA631(Sp)-lbpAp-GFP-mut3 plasmids. The soluble PARP1-BRCT  
849 does not initiate a heat shock response and results in a low green fluorescent signal, whereas the  
850 insoluble BRCA1-BRCT protein triggers the heat shock response causing a high green fluorescent  
851 signal. The pSEVA631(Sp)-lbpAp-GFP-ASV plasmid has an improved signal-to-noise ratio and is  
852 preferred over the pSEVA631(Sp)-lbpAp-GFP-mut3 plasmid. All measurements were performed with  
853  $n=3$  and  $n\geq 3$ , respectively.

**a**

**Translation**

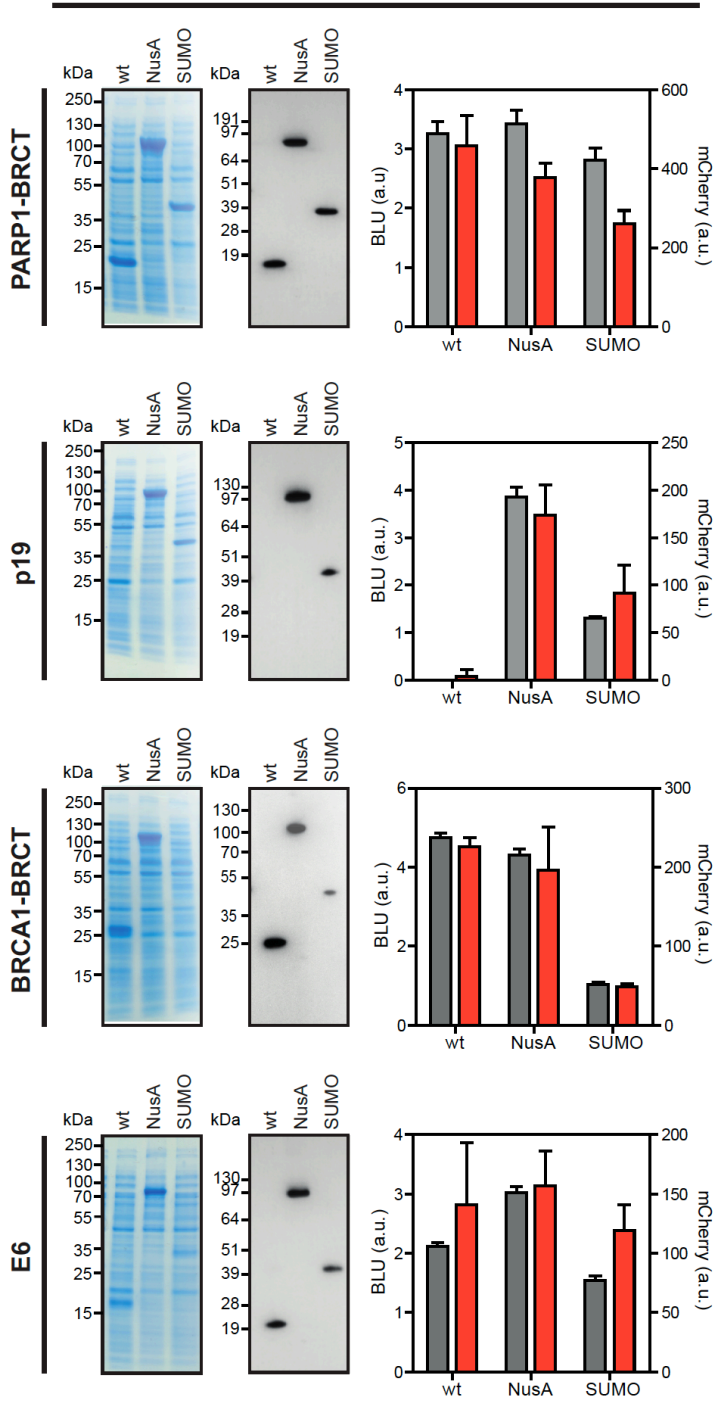

**b**

**Solubility**

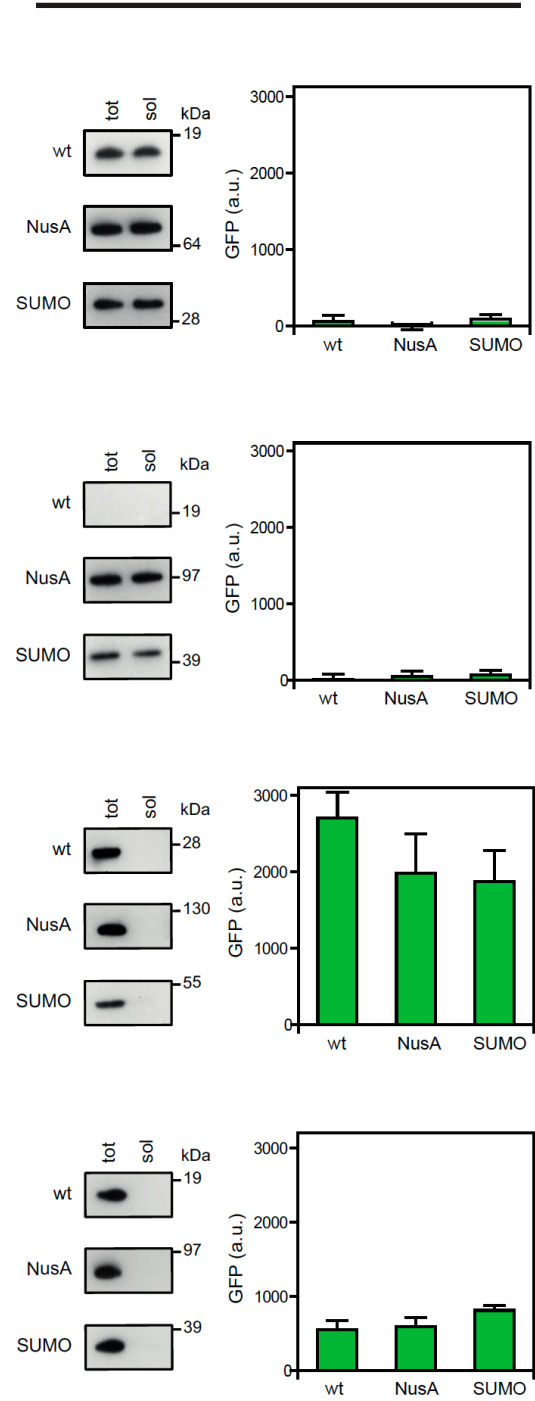

854

855 **Figure 3:** Validation of the dual protein translation and misfolding biosensor. The solubility tags NusA  
856 and SUMO were fused to four proteins; PARP1-BRCT, p19, a truncated BRCA1-BRCT, and E6, with  
857 known propensities for misfolding. (a) The proteins were translationally coupled to the fluorescent  
858 protein mCherry to monitor the translation using FACS. A minimum of five independent samples was  
859 analysed for each plasmid combination. Protein expression was analysed by SDS-PAGE analysis and  
860 quantified from Western blots (grey) (BLU = biochemical luminescence unit) and correlated to the  
861 mean mCherry fluorescence signal from the analysis of 10,000 cells (red). (b) Western blot analysis of  
862 total protein yield (tot) and soluble protein (sol) after fractionated cell disruption in association with  
863 the quantified GFP response signal for insoluble protein.

864

865

866

867

868

869

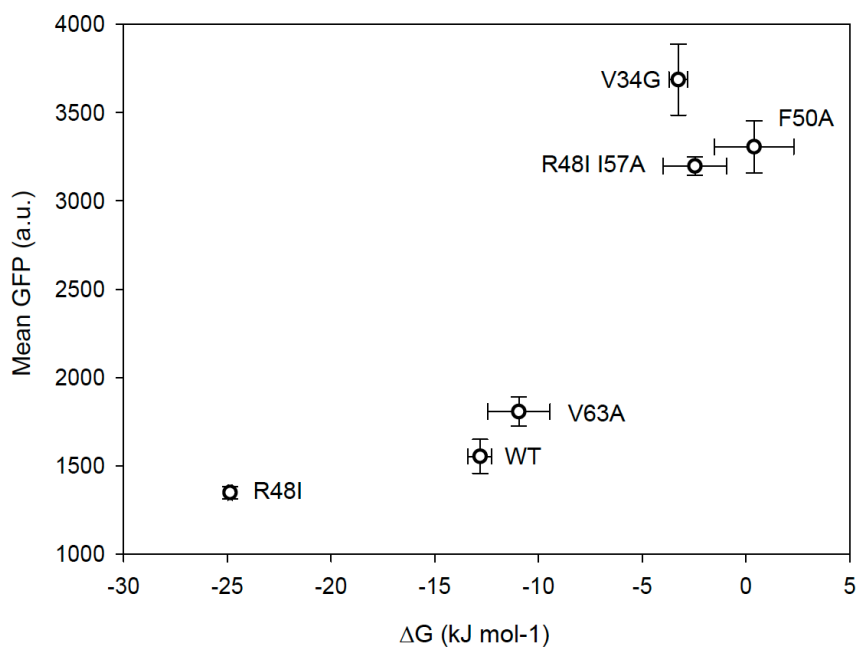

870

871 **Figure 4:** Correlation between GFP fluorescence and protein stability. Six CI2 variants were co-  
872 expressed with the protein folding sensor (pSEVA631(Sp)-IbpAp-GFP-ASV), and the GFP fluorescence  
873 was analysed by FACS. The average mean GFP fluorescence was compared to the Gibbs free energy of  
874 unfolding ( $\Delta G_{\text{unf}}$ ) determined from global fits of thermal and chemical unfolding of each protein. All  
875 measurements were determined in triplicates with standard deviations.

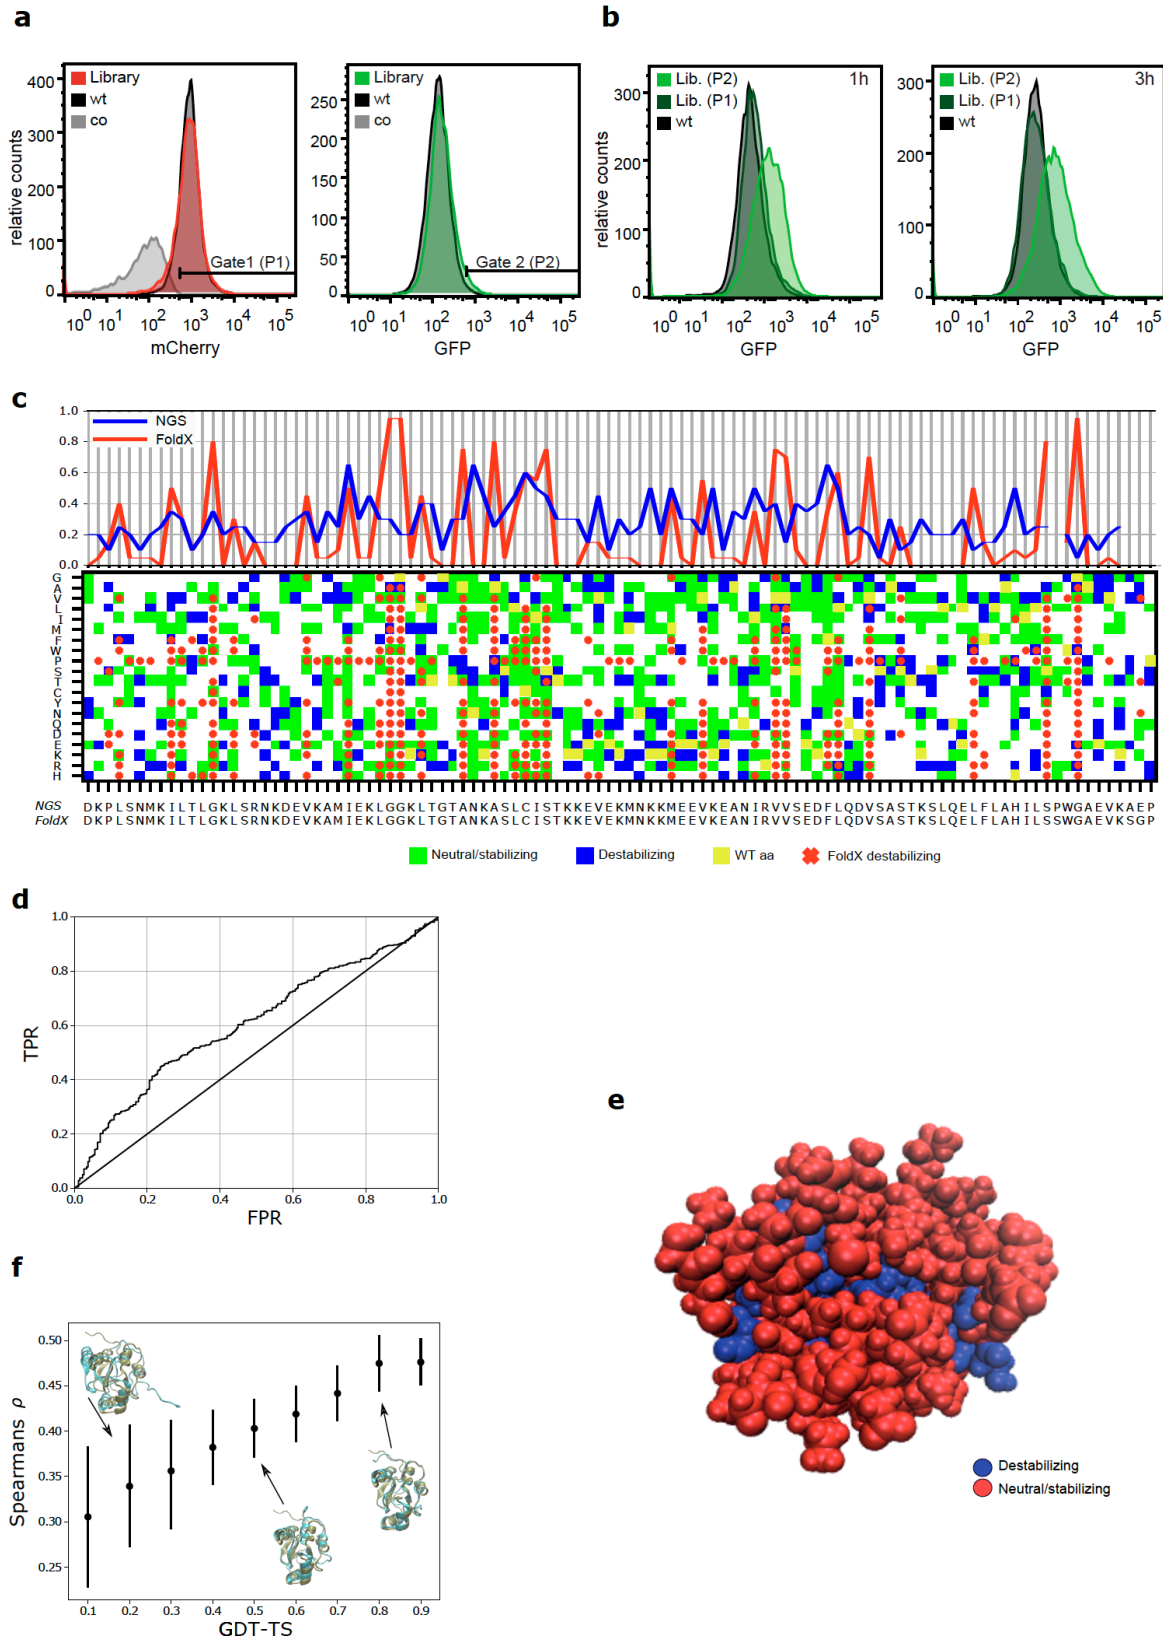

877 **Figure 5:** FACS sorting and deep mutational scanning to identify variants of PARP1-BRTC with  
878 decreased protein folding. (a) FACS sorting of PARP1-BRCT mutant library (red and green), PARP1-  
879 BRCT WT (black), and the translation sensor plasmid without a gene inserted (grey). Cells were sorted  
880 for high translation levels (Gate 1) and degree of protein misfolding (Gate 2). (b) The sorted cells were  
881 grown overnight and analysed by flow cytometry one and three hours after protein expression was  
882 induced. (c) Top: Ratio between the number of destabilizing mutations and the number of total  
883 mutations for each amino acid residue for both FoldX (red) and experimental data (blue). Bottom:  
884 Matrix plot indicating if an amino acid change (y-axis) of the sequence (x-axis) was destabilizing  
885 according to the high-throughput sequencing data as well as for FoldX calculations. For the  
886 experimental data, green and blue squares indicate neutral/stabilizing and destabilizing mutations,  
887 respectively. Yellow marks the wildtype to wildtype mutants, and white marks mutations with no  
888 experimental readout. Red x's indicate destabilizing mutations according to FoldX, with a cut-off of 3  
889 kcal/mol. All squares without red x's are predicted to be neutral or stable mutants. (d) Receiver  
890 Operating Characteristic analysis of sequencing data and predicted FoldX  $\Delta\Delta G$ s. The sequencing data  
891 provides the mutation specific labels (blue vs green in Figure 5C) and the  $\Delta\Delta G$ s predicted from FoldX  
892 are the mutation specific scores. (e) Structural visualization of stable vs destabilizing sequence  
893 positions of the PARP1-BRCT structure based on the experimental data. Blue residues that destabilize  
894 the protein have a  $N_{\text{destable}}/N_{\text{total}} \geq 0.2$ , while the remaining are colored red. (f) Scoring of 20.000  
895 structural decoys based on the experimental data. The plot shows the Spearman's correlation  
896 coefficient,  $\rho$ , that quantifies the correlation between residue depth and mutational tolerance based  
897 on the experimental data, as well as a structural quality measure defined by the structural Global



898 Distance Test – Total Score (GDT-TS) score, where one corresponds to a native or near native  
899 structure. Here, the mean  $\rho$  is plotted for structures binned to the closest 0.1 GDT-TS bins. The error  
900 bars represent standard deviations for the individual bins.

901

902

903

904

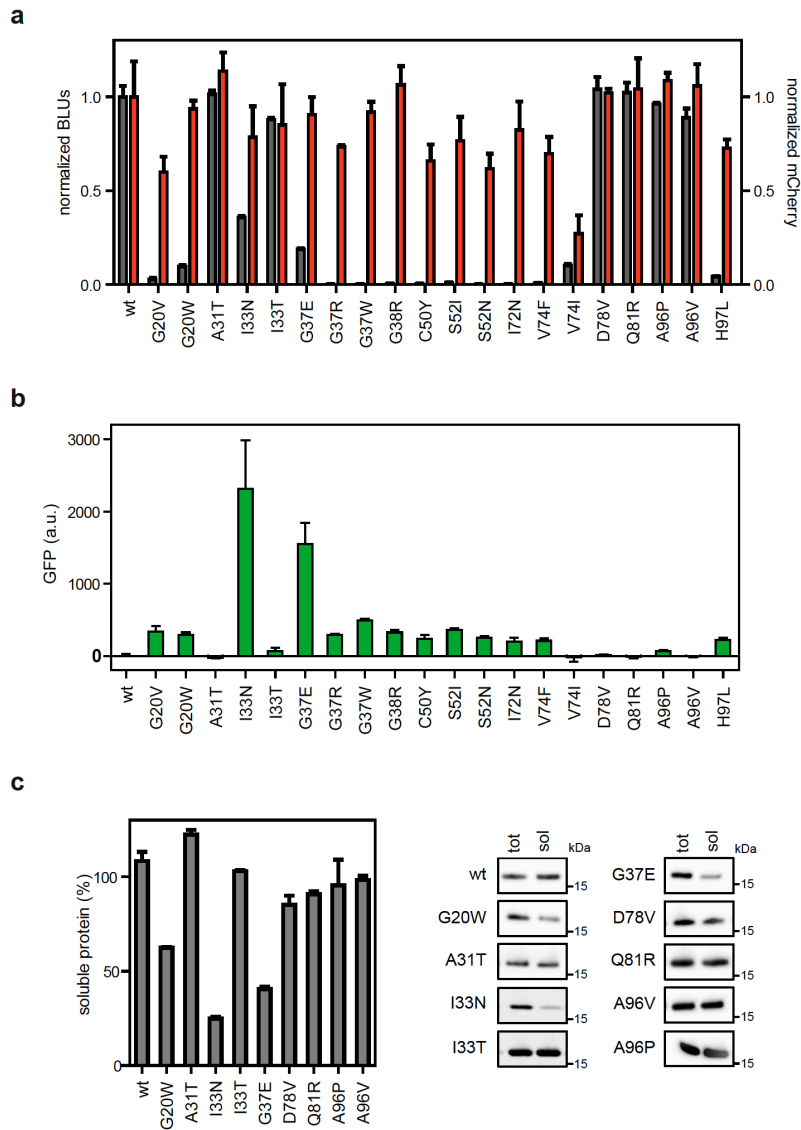

905

906 **Figure 6:**

907 PARP1-BRCT mutants with changed folding properties identified from a randomly generated mutant

908 library using the dual-reporter system. (a) Correlation between translation levels of 20 PARP1-BRCT

909 mutants quantified from Western blots (grey) and flow cytometry analysis of mean mCherry

910 fluorescence (red), each normalized to the WT signal. (b) GFP levels analysed using flow cytometry as

911 a measure for protein solubility and folding properties. (c) Percentage of soluble protein determined

912 by Western blot for the 9 PARP1-BRCT mutants with a detectable GFP response signal. Western blot  
913 analysis of total protein yield (tot) and soluble protein (sol) after fractionated cell disruption.  
914

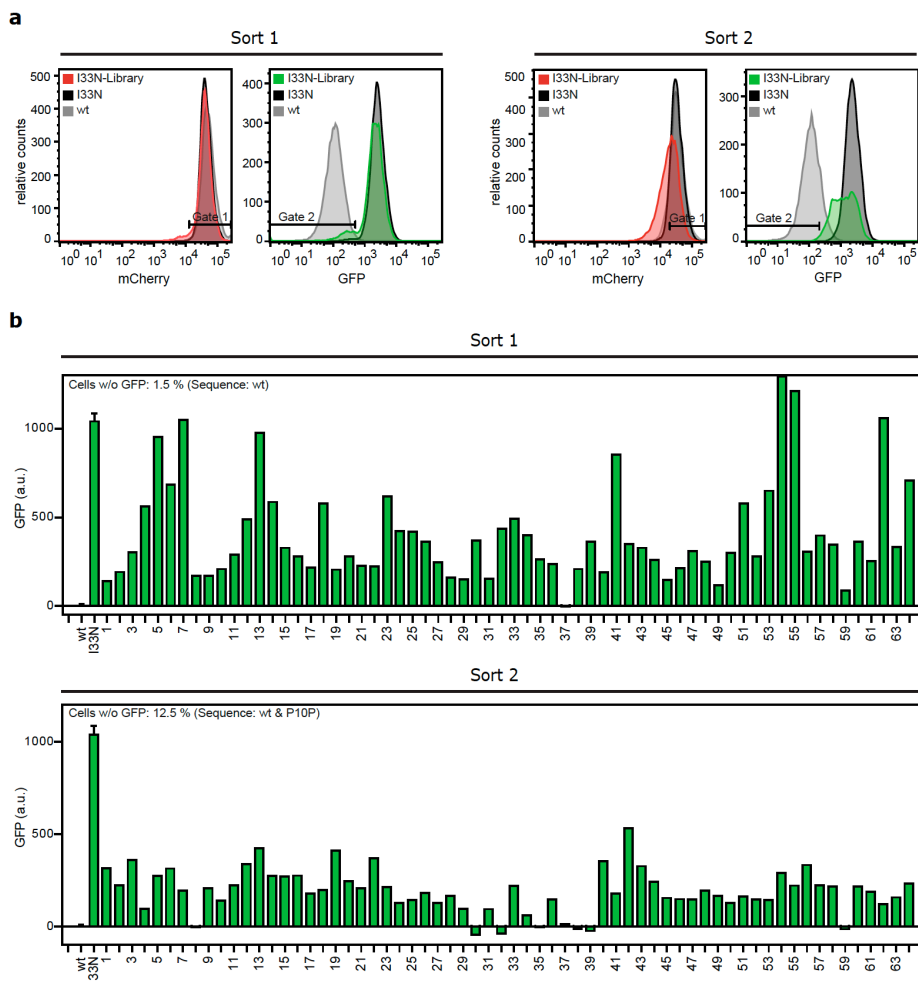

915

916 **Figure 7:**

917 Identification of protein variants with improved folding properties from a PARP1-BRCT-I33N mutant  
918 library using the dual-reporter system. A random PARP1-BRCT-I33N mutant library was co-expressed  
919 with the protein folding sensor. The cell populations were analysed using FACS one hour after IPTG  
920 induced protein expression. (a) FACS analysis of PARP1-BRCT WT, PARP1-BRCT-I33N, and the PARP1-

921 BRCT-I33N mutant library, where the mCherry signal correlates with the translation level of PARP1-  
922 BRCT, while the GFP fluorescence is a measure of folding properties. Two gates are defined for sorting  
923 populations with high translation and low GFP fluorescence, thus with improved folding properties  
924 compared to PARP1-BRCT-I33N. A shift is observed in GFP signal distribution and intensities between  
925 the two rounds of sorting, showing that it is possible to enrich the population with low GFP clones  
926 after multiple rounds of sorting. (b) Single clones sorted after each round of sorting with 1.5 % or 12.5  
927 % overlapping with the PARP1-BRCT WT GFP signal. The single clones were sequenced and all were  
928 reverted back to PARP1-BRCT WT, except one silent mutation, P10P, found after the second sorting.
